# Supplementary material
Source: PubMed Central journal article supplement (PMC8315986)
Supplement: aac.00048-21-s000s1.pdf [file aac.00048-21-s000s1.pdf]

**Supplemental Table 1. Serotype data from culture analysis of isolates collected in the Ohta *et al* 2017 study**

|                                                                               | Cattle ID <sup>a</sup> | Serovars <sup>b,c</sup> |                      |                     |
|-------------------------------------------------------------------------------|------------------------|-------------------------|----------------------|---------------------|
|                                                                               |                        | Day 0                   | Day 20               | Day 26 <sup>e</sup> |
| All cattle in each pen treated with CTC, one animal per pen treated with CCFA | 2266                   | Mbandaka                | -                    | -                   |
|                                                                               | 2272                   | Give                    | -                    | -                   |
|                                                                               | 2379                   | Anatum                  | -                    | Give                |
|                                                                               | 2389                   | Give                    | -                    | -                   |
|                                                                               | 2403                   | Montevideo              | -                    | Mbandaka            |
|                                                                               | 2415                   | Mbandaka <sup>d</sup>   | Reading              | Reading             |
|                                                                               | 2268                   | -                       | Reading <sup>d</sup> | -                   |
|                                                                               | 2331                   | Mbandaka                | Reading <sup>d</sup> | Reading             |
|                                                                               | 2337                   | Montevideo              | -                    | Give                |
|                                                                               | 2345                   | Give                    | -                    | -                   |
|                                                                               | 2378                   | Give                    | -                    | Montevideo          |
|                                                                               | 2399                   | Montevideo              | -                    | -                   |
|                                                                               | 2244 <sup>f</sup>      | Mbandaka                | Reading              | Reading             |
|                                                                               | 2276                   | Give                    | -                    | -                   |
|                                                                               | 2285                   | Mbandaka                | -                    | -                   |
|                                                                               | 2296                   | Kentucky                | -                    | -                   |
|                                                                               | 2324                   | Kentucky                | Reading              | Reading             |
|                                                                               | 2326 <sup>f</sup>      | Kentucky                | -                    | Give                |
|                                                                               | 2357                   | Mbandaka                | Reading              | Reading             |
|                                                                               | 2409                   | Mbandaka                | -                    | Reading             |
|                                                                               | 2239                   | Mbandaka                | -                    | Kentucky            |
|                                                                               | 2247                   | Mbandaka                | Reading <sup>d</sup> | Montevideo          |
|                                                                               | 2261                   | Give                    | -                    | -                   |
|                                                                               | 2264                   | Mbandaka                | -                    | -                   |
|                                                                               | 2265                   | Mbandaka <sup>d</sup>   | Reading              | Mbandaka            |
|                                                                               | 2307                   | Give <sup>d</sup>       | -                    | -                   |
|                                                                               | 2341                   | Kentucky <sup>d</sup>   | -                    | -                   |
|                                                                               | 2358                   | Mbandaka                | -                    | Kentucky            |
|                                                                               | 2366 <sup>f</sup>      | Mbandaka                | Reading <sup>d</sup> | Reading             |
|                                                                               | 2392 <sup>f</sup>      | Mbandaka                | -                    | Reading             |
| 2410                                                                          | Kentucky               | -                       | Reading              |                     |
| All cattle treated with CTC and with CCFA                                     | 2283                   | Give                    | -                    | -                   |
|                                                                               | 2287                   | Give                    | -                    | Give                |
|                                                                               | 2323                   | Give                    | -                    | -                   |
|                                                                               | 2332                   | Give                    | -                    | -                   |
|                                                                               | 2336                   | Give <sup>d</sup>       | -                    | -                   |
|                                                                               | 2347                   | Give                    | Give                 | Give                |
|                                                                               | 2384                   | Give <sup>d</sup>       | -                    | Mbandaka            |
|                                                                               | 2391                   | Give                    | -                    | -                   |
|                                                                               | 2394                   | Give                    | -                    | -                   |
|                                                                               | 2421                   | Mbandaka                | -                    | -                   |
|                                                                               | 2254                   | Mbandaka                | -                    | -                   |
|                                                                               | 2274                   | Mbandaka                | -                    | Give                |
|                                                                               | 2279                   | -                       | Give                 | Give                |
|                                                                               | 2304                   | Mbandaka                | -                    | -                   |
|                                                                               | 2312                   | Montevideo              | -                    | -                   |
|                                                                               | 2313 <sup>f</sup>      | Mbandaka                | -                    | Mbandaka            |
|                                                                               | 2371                   | Give                    | -                    | -                   |
|                                                                               | 2372                   | Give                    | Reading              | Mbandaka            |
|                                                                               | 2377                   | Mbandaka                | -                    | -                   |
|                                                                               | 2413                   | Give                    | -                    | -                   |
|                                                                               | 2302                   | Give                    | Reading              | -                   |
|                                                                               | 2321                   | Montevideo              | -                    | -                   |
|                                                                               | 2327                   | Montevideo              | -                    | Kentucky            |
|                                                                               | 2339                   | Give                    | -                    | Reading             |
|                                                                               | 2353                   | Give                    | -                    | -                   |
|                                                                               | 2238                   | Give                    | -                    | Reading             |
|                                                                               | 2255 <sup>f</sup>      | Mbandaka                | -                    | -                   |
|                                                                               | 2303                   | Mbandaka <sup>d</sup>   | -                    | -                   |
|                                                                               | 2328                   | Montevideo              | -                    | Kentucky            |
|                                                                               | 2354                   | Mbandaka                | -                    | Reading             |
| 2359                                                                          | Montevideo             | -                       | -                    |                     |
| 2374                                                                          | Mbandaka <sup>d</sup>  | -                       | Mbandaka             |                     |
| 2383                                                                          | Give <sup>d</sup>      | Reading <sup>d</sup>    | -                    |                     |
| 2398                                                                          | Mbandaka               | Reading                 | -                    |                     |
| 2400                                                                          | Mbandaka <sup>d</sup>  | Reading                 | Mbandaka             |                     |
| 2411                                                                          | Give                   | -                       | Reading              |                     |

<sup>a</sup> Separate pens are delineated by a bold line

<sup>b</sup> *In silico* serotyping from whole genome sequences was performed on a single colony from each fecal sample

<sup>c</sup> -: Samples were *Salmonella* negative

<sup>d</sup> Samples that were analyzed in Ohta *et al.* (2017), but which were not analyzed in this study due to either showing up as *Salmonella*-negative in the new enrichments performed in this study, poor sequencing after being repeated twice, or contaminating *E. coli* sequence reads which resulted in less than 1000 *Salmonella* CRISPR reads.

<sup>e</sup> Data not shown for additional cattle that were positive at Day 26 but negative at Day 0 and Day 20

<sup>f</sup> Samples where CRISPR-SeroSeq identified ser. Reading at day 0

**Reference**

Ohta N, Norman KN, Norby B, Lawhon SD, Vinasco J, den Bakker H, Loneragan GH, Scott HM. 2017. Population dynamics of enteric *Salmonella* in response to antimicrobial use in beef feedlot cattle. *Sci Rep* 7:14310.
